# Supplementary material
Source: PubMed Central journal article supplement (PMC7450362)
Supplement: NIHMS1620118-supplement-suppl_materials.pdf [file NIHMS1620118-supplement-suppl_materials.pdf]

In the format provided by the authors and unedited.

# Pre-existing immunity to influenza virus hemagglutinin stalk might drive selection for antibody-escape mutant viruses in a human challenge model

Jae-Keun Park<sup>1</sup>, Yongli Xiao<sup>1</sup>, Mitchell D. Ramuta<sup>1,5</sup>, Luz Angela Rosas<sup>1</sup>, Sharon Fong<sup>1</sup>, Alexis M. Matthews<sup>1</sup>, Ashley D. Freeman<sup>1</sup>, Monica A. Gouzoulis<sup>2</sup>, Natalia A. Batchenkova<sup>1</sup>, Xingdong Yang<sup>1</sup>, Kelsey Scherler<sup>3</sup>, Li Qi<sup>1</sup>, Susan Reed<sup>2</sup>, Rani Athota<sup>2</sup>, Lindsay Czajkowski<sup>2</sup>, Alison Han<sup>2</sup>, David M. Morens<sup>4</sup>, Kathie-Anne Walters<sup>3</sup>, Matthew J. Memoli<sup>2</sup>, John C. Kash<sup>1</sup> and Jeffery K. Taubenberger<sup>1</sup>✉

---

<sup>1</sup>Viral Pathogenesis and Evolution Section, Laboratory of Infectious Diseases, Division of Intramural Research, National Institute of Allergy and Infectious Diseases, National Institutes of Health, Bethesda, MD, USA. <sup>2</sup>LID Clinical Studies Unit, Laboratory of Infectious Diseases, Division of Intramural Research, National Institute of Allergy and Infectious Diseases, National Institutes of Health, Bethesda, MD, USA. <sup>3</sup>Institute for Systems Biology, Seattle, WA, USA. <sup>4</sup>Office of the Director, National Institute of Allergy and Infectious Diseases, National Institutes of Health, Bethesda, MD, USA. <sup>5</sup>Present address: Department of Pathology and Laboratory Medicine, University of Wisconsin–Madison, Madison, WI, USA. ✉e-mail: [taubenbergerj@niaid.nih.gov](mailto:taubenbergerj@niaid.nih.gov)

**Supplementary Table 1. List of primers and probes used for SNP assay, one-step RT-PCR, and influenza Matrix gene-based viral load quantification.**

| Oligo name                | Oligo sequence (5' to 3')                | Final concentration |
|---------------------------|------------------------------------------|---------------------|
| SNP_For                   | GGATATGCAGCCGACCTGAA                     | 950 nM              |
| SNP_Rev                   | CCAGGTGGTTGAACTCTTTACCTACT               | 950 nM              |
| SNP_probe_A388            | [VIC] - CAGAATGCCATTGAC - [MGB/NFQ]*     | 250 nM              |
| SNP_probe_V388            | [FAM] - CAGAATGTCATTGACG - [MGB/NFQ]     | 250 nM              |
| Initial 1-step RT-PCR_For | AACACCAGCCTCCCATTTC                      | 500 nM              |
| Initial 1-step RT-PCR_Rev | CAGTTCGGCATTGTAAGTCCA                    | 500 nM              |
| Flu_cDNA                  | AGCRAAAGCAGG                             | 0.05 nM             |
| Total_cDNA                | Oligo(dT) <sub>20</sub>                  | 1.25 nM             |
| InfA_Matrix_Forward       | GACCRATCCTGTCACCTCTGAC                   | 750 nM              |
| InfA_Matrix_Reverse       | AGGGCATTYTGACAAAKCGTCTA                  | 750 nM              |
| InfA_Matrix_Probe         | [FAM]-TGCAGTCCTCGCTCACTGGGCACG-[BHQ1]    | 250 nM              |
| GAPDH_Forward             | catalog no. 4352932E (ThermoFisher, USA) |                     |
| GAPDH_Reverse             |                                          |                     |
| GAPDH_Probe               |                                          |                     |

\* [MGB/NFQ] - minor groove binder and nonfluorescent quencher
